# Supplementary material for: Cell Free Methylated Tumor DNA in Bronchial Lavage as an Additional Tool for Diagnosing Lung Cancer—A Systematic Review
Source: MDPI journal article supplement (doi:10.3390/cancers14092254), 2022-04-30
Supplement: s1 [file s1]

Review

# Cell free methylated tumor DNA in bronchial lavage as an additional tool for diagnosing lung cancer – A systematic review

Sara Witting Christensen Wen<sup>1,2\*</sup>, Jan Wen<sup>3</sup>, Torben Frøstrup Hansen<sup>1,2</sup>, Anders Jakobsen<sup>1,2</sup> and Ole Hilberg<sup>2,4</sup>

## Supplementary Materials

### 1. Detailed database searches

PubMed: Searched on February 25, 2022.

#### Block 1:

(bronchiolo-alveolar adenocarcinomas) OR (bronchiolo-alveolar adenocarcinoma) OR (bronchiolo alveolar adenocarcinomas) OR (bronchiolo alveolar adenocarcinoma) OR (carcinoma, bronchogenic) OR (bronchial neoplasms) OR (bronchial neoplasm) OR (bronchial carcinomas) OR (bronchial carcinoma) OR (squamous cell lung cancer) OR (lung squamous cell carcinoma) OR (squamous cell carcinoma lung) OR (lung adenocarcinoma) OR (adenocarcinoma lung) OR (small cell lung carcinoma) OR (small cell lung cancer) OR (non small cell lung carcinoma) OR (non-small cell lung carcinoma) OR (non small cell lung cancer) OR (non-small cell lung cancer) OR (pulmonary carcinomas) OR (pulmonary carcinoma) OR (pulmonary neoplasms) OR (lung carcinomas) OR (lung malignan\*) OR (Lung malignan\*) OR (lung malignancies) OR (pulmonary neoplasm) OR (lung carcinoma) OR (lung malignancy) OR (lung neoplasms) OR (lung neoplasm) OR (lung cancer) OR ("Lung Neoplasms"[Mesh])

Hits: 431,599.

**Citation:** Wen, S.W.C.; Wen, J.; Hansen, T.F.; Jakobsen, A.; Hilberg, O. Cell Free Methylated Tumor DNA in Bronchial Lavage as an Additional Tool for Diagnosing Lung Cancer—A Systematic Review. *Cancers* **2022**, *14*, 2254. <https://doi.org/10.3390/cancers14092254>

Academic Editors: Danijela Koppers-Lalic, Vesselin Baev and Bruno Costa Silva

Received: 31 March 2022

Accepted: 28 April 2022

Published: 30 April 2022

**Publisher's Note:** MDPI stays neutral with regard to jurisdictional claims in published maps and institutional affiliations.

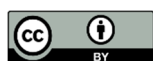

**Copyright:** © 2022 by the authors. Licensee MDPI, Basel, Switzerland. This article is an open access article distributed under the terms and conditions of the Creative Commons Attribution (CC BY) license (<https://creativecommons.org/licenses/by/4.0/>).

#### Block 2:

(bronchoalveolar lavage[MeSH Terms]) OR (bronchoalveolar lavage fluid[MeSH Terms]) OR (bronchial lavage) OR (bronchial lavages) OR (bronchial lavage\*) OR (bronchial lavage fluid) OR (bronchial lavage fluids) OR (bronchial lavage fluid\*) OR (bronchoalveolar lavage) OR (bronchoalveolar lavages) OR (bronchoalveolar lavage\*) OR (bronchoalveolar lavage fluid) OR (bronchoalveolar lavage fluids) OR (bronchoalveolar lavage fluid\*) OR (bronchoalveolar lavage) OR (bronchoalveolar lavages) OR (bronchoalveolar lavage\*) OR (bronchoalveolar lavage fluid) OR (bronchoalveolar lavage fluids) OR (bronchial wash) OR (bronchial washes) OR (bronchial washing) OR (bronchial washings) OR (bronchial wash\*) OR (bronchial fluid) OR (bronchial fluids) OR (bronchial fluid\*) OR (lung lavage) OR (lung lavages) OR (lung lavage\*) OR (bronchopulmonary lavage) OR (Bronchopulmonary lavages) OR (Bronchopulmonary lavage\*) OR (Pulmonary lavage fluid) OR (Pulmonary lavage fluids) OR (Pulmonary lavage

fluid\*) OR (Bronchoalveolar wash) OR (Bronchoalveolar washes) OR (Bronchoalveolar washing) OR (Bronchoalveolar washings) OR (Bronchoalveolar wash\*) OR (Bronchioalveolar wash) OR (Bronchioalveolar washes) OR (Bronchioalveolar washing) OR (Bronchioalveolar washings) OR (Bronchioalveolar wash\*) OR (Bronchopulmonary wash) OR (Bronchopulmonary washes) OR (Bronchopulmonary washing) OR (Bronchopulmonary washings) OR (Bronchopulmonary wash\*) OR (Pulmonary wash) OR (Pulmonary washes) OR (Pulmonary washing) OR (Pulmonary washings) OR (Pulmonary wash\*) OR (Lung wash) OR (Lung washes) OR (Lung washing) OR (Lung washings) OR (Lung wash\*)

Hits: 80,825.

Block 3:

(liquid biops\*) OR (liquid biopsies) OR (liquid biopsy) OR (liquid biopsy[MeSH Terms]) OR (Genetic methylat\*) OR (Genetic methylations) OR (Genetic methylation) OR (methylat\*) OR (methylations) OR (methylated) OR (methylation) OR (methylat\* gene) OR (methylated gene) OR (Gene methylat\*) OR (gene methylations) OR (gene methylation) OR (methylat\* dna) OR (DNA methylat\*) OR (DNA methylations) OR (dna methylation) OR (methylated dna) OR (cfdna) OR (ctdna) OR (circulating dna) OR (Circulating tumor-specific DNA) OR (Circulating tumor specific DNA) OR (Circulating cell-free tumor DNA) OR (Circulating cell free tumor DNA) OR (circulating tumor dna) OR (cell-free tumor dna) OR (cell free tumor dna) OR (cell-free dna) OR (cell free dna) OR (tumor dna) OR (DNA, neoplasm[MeSH Terms]) OR (circulating tumor dna[MeSH Terms])

Hits: 865,994.

Block 1 AND block 2 AND block 3

Hits: 769.

Filter, English. Hits: 746.

Embase Classic + Embase from 1947: Searched on February 25, 2022.

Block 1:

exp lung cancer/ OR lung cancer/ OR lung cancer.mp. OR (lung adj3 cancer).mp. OR lung neoplasm.mp. OR lung neoplasms.mp. OR (lung adj3 neoplasm).mp. OR (lung adj3 neoplasms).mp. OR lung malignancy.mp. OR (lung adj3 malignancy).mp. OR lung malignancies.mp. OR (lung adj3 malignancies).mp. OR lung maligna\*.mp. OR (lung adj3 maligna\*).mp. OR lung carcinoma.mp. OR (lung adj3 carcinoma).mp. OR lung carcinomas.mp. OR (lung adj3 carcinomas).mp. OR pulmonary neoplasm.mp. OR (pulmonary adj3 neoplasm).mp. OR pulmonary neoplasms.mp. OR (pulmonary adj3 neoplasms).mp. OR pulmonary carcinoma.mp. OR (pulmonary adj3 carcinoma).mp. OR pulmonary carcinomas.mp. OR (pulmonary adj3 carcinomas).mp. OR pulmonary cancer.mp. OR (pulmonary adj3 cancer).mp. OR pulmonary cancers.mp. OR (pulmonary adj3 cancers).mp. OR non-small cell lung cancer.mp. OR exp lung non small cell cancer/ OR exp non small cell lung cancer/ OR non small cell lung cancer.mp. OR non-small cell lung carcinoma.mp. OR non small cell lung carcinoma.mp. OR non-small cell lung carcinomas.mp. OR non small cell lung carcinomas.mp. OR small cell lung cancer.mp. OR small cell lung cancers.mp. OR small cell lung carcinoma.mp. OR small cell lung carcinomas.mp. OR (small cell adj3 lung adj3 cancer).mp. OR (small cell adj3 lung adj3 carcinoma).mp. OR (non small cell adj3 lung adj3 cancer).mp. OR (non-small cell adj3 lung

adj3 cancer).mp. OR (non small cell adj3 lung adj3 carcinoma).mp. OR (non-small cell adj3 lung adj3 carcinoma).mp. OR adenocarcinoma of the lung.mp. OR lung adenocarcinoma.mp. OR (lung adj3 adenocarcinoma).mp. OR (lung adj3 adenocarcinomas).mp. OR squamous cell carcinoma of the lung.mp. OR lung squamous cell carcinoma.mp. OR (lung adj3 squamous cell carcinoma).mp. OR squamous cell lung cancer.mp. OR (squamous cell adj3 lung adj3 cancer).mp. OR bronchial carcinoma.mp. OR bronchial carcinomas.mp. OR (bronchial adj3 carcinoma).mp. OR (bronchial adj3 carcinomas).mp. OR bronchial neoplasm.mp. OR bronchial neoplasms.mp. OR (bronchial adj3 neoplasm).mp. OR (bronchial adj3 neoplasms).mp. OR carcinoma bronchogenic.mp. OR (carcinoma adj3 bronchogenic).mp. OR Bronchiolo alveolar adenocarcinoma.mp. OR Bronchiolo alveolar adenocarcinomas.mp. OR Bronchiolo-alveolar adenocarcinoma.mp. OR Bronchiolo-alveolar adenocarcinoma.mp. OR Bronchiolo-alveolar adenocarcinomas.mp. OR (Bronchiolo adj3 alveolar adj3 adenocarcinoma).mp. OR Schneeberg disease.mp. OR (Schneeberg adj3 disease).mp.

Hits: 514,575.

## Block 2:

exp lung lavage/ OR exp bronchoalveolar lavage fluid/ OR bronchial lavage.mp. OR bronchial lavages.mp. OR (bronchial adj3 lavage).mp. OR (bronchial adj3 lavage\*).mp. OR bronchial lavage fluid.mp. OR bronchial lavage fluids.mp. OR (bronchial adj3 lavage adj3 fluid).mp. OR Bronchoalveolar lavage.mp. OR (Bronchoalveolar adj3 lavage).mp. OR (Bronchoalveolar adj3 lavages).mp. OR Bronchoalveolar lavages.mp. OR Bronchoalveolar lavage\*.mp. OR (Bronchoalveolar adj3 lavage\*).mp. OR Bronchoalveolar lavage fluid.mp. OR Bronchoalveolar lavage fluids.mp. OR (Bronchoalveolar adj3 lavage adj3 fluid).mp. OR Bronchoalveolar lavage fluid\*.mp. OR Bronchioalveolar lavage.mp. OR (Bronchioalveolar adj3 lavage).mp. OR Bronchioalveolar lavages.mp. OR (Bronchioalveolar adj3 lavages).mp. OR (Bronchioalveolar adj3 lavage\*).mp. OR Bronchioalveolar lavage fluid.mp. OR Bronchioalveolar lavage fluids.mp. OR (Bronchioalveolar adj3 lavage adj3 fluid).mp. OR (Bronchioalveolar adj3 lavage adj3 fluid\*).mp. OR Bronchial wash.mp. OR Bronchial washes.mp. OR Bronchial washing.mp. OR Bronchial washings.mp. OR (Bronchial adj3 wash\*).mp. OR Bronchial fluid.mp. OR Bronchial fluids.mp. OR (Bronchial adj3 fluid).mp. OR (Bronchial adj3 fluids).mp. OR (Bronchial adj3 fluid\*).mp. OR lung lavage.mp. OR Lung lavages.mp. OR (Lung adj3 lavage).mp. OR (Lung adj3 lavages).mp. OR (Lung adj3 lavage\*).mp. OR Bronchopulmonary lavage.mp. OR Bronchopulmonary lavages.mp. OR Bronchopulmonary lavag\*.mp. OR (Bronchopulmonary adj3 lavage).mp. OR (Bronchopulmonary adj3 lavag\*).mp. OR Pulmonary lavage fluid.mp. OR Pulmonary lavage fluids.mp. OR Pulmonary lavage fluid\*.mp. OR Bronchoalveolar wash.mp. OR Bronchoalveolar washes.mp. OR Bronchoalveolar washing.mp. OR Bronchoalveolar washings.mp. OR Bronchoalveolar wash\*.mp. OR Bronchioalveolar wash.mp. OR Bronchioalveolar washes.mp. OR Bronchioalveolar washing.mp. OR Bronchioalveolar washings.mp. OR Bronchioalveolar wash\*.mp. OR Bronchopulmonary wash.mp. OR Bronchopulmonary washes.mp. OR Bronchopulmonary washing.mp. OR Bronchopulmonary washings.mp. OR Bronchopulmonary wash\*.mp. OR Pulmonary wash.mp. OR Pulmonary washes.mp. OR Pulmonary washings.mp. OR Pulmonary wash\*.mp. OR Lung wash.mp. OR Lung washes.mp. OR Lung washings.mp. OR Lung washing.mp. OR Lung wash\*.mp.

Hits: 78,074.

## Block 3:

exp circulating tumor DNA/ OR exp liquid biopsy/ OR tumor dna.mp. OR tumour dna.mp OR (tumor adj3 dna).mp. OR (tumour adj3 dna).mp. OR cell free dna.mp. OR cell-free dna.mp. OR cell free tumor dna.mp. OR (cell free adj3 tumor adj3 dna).mp. OR (cell free adj3 tumour adj3 dna).mp. OR circulating tumor dna.mp. OR (circulating adj3 tumor adj3 dna).mp. OR circulating tumour dna.mp. OR (circulating adj3 tumour adj3 dna).mp. OR Circulating cell free tumor DNA.mp. OR (Circulating adj3 cell free adj3 tumor DNA).mp. OR (Circulating adj3 cell free adj3 tumour DNA).mp. OR Circulating cell free tumour DNA.mp. OR Circulating tumor specific DNA.mp. OR Circulating tumour specific DNA.mp. OR (Circulating adj3 tumor specific DNA).mp. OR (Circulating adj3 tumour specific DNA).mp. OR Circulating DNA.mp. OR ctdna.mp. OR cfdna.mp. OR Methylated DNA.mp. OR (Methylated adj3 DNA).mp. OR DNA methylation.mp. OR DNA methylations.mp. OR DNA methylation\*.mp. OR DNA methylat\*.mp. OR (DNA adj3 methylat\*).mp. OR Gene methylation.mp. OR Gene methylations.mp. OR Gene methylat\*.mp. OR (Gene adj3 methylation).mp. OR Gene\* methylation.mp. OR (Gene adj3 methylat\*).mp. OR (Gene\* adj3 methylat\*).mp. OR methylated gene.mp. OR methylat\* gene.mp. OR methylation.mp. OR methylations.mp. OR methylated.mp. OR methylat\*.mp. OR genetic methylation.mp. OR genetic methylations.mp. OR (genetic adj3 methylat\*).mp. OR liquid biopsy.mp. OR liquid biopsies.mp. OR liquid biops\*.mp.

Hits: 241,736.

Block 1 AND block 2 AND block 3

Hits: 173 hits.

Medline: Searched on March 9, 2022.

Same search strings as Embase.

Block 1 AND block 2 AND block 3

Hits: 87.

Web of Science Core Collection: Searched March 1, 2022.

Block 1:

TS=(lung cancer) OR TS=(lung neoplasm) OR TS=(lung malignancy) OR TS=(lung malignan\*) OR TS=(lung neoplas\*) OR TS=(lung carcinoma) OR TS=(lung carcino\*) OR TS=(Pulmonary neoplasm) OR TS=(Pulmonary neoplas\*) OR TS=(Pulmonary carcinoma) OR TS=(Pulmonary carcino\*) OR TS=(Pulmonary cancer) OR TS=(Pulmonary cancer\*) OR TS=(Non-small cell lung cancer ) OR TS=(Non small cell lung cancer ) OR TS=(Non-small cell lung carcinoma) OR TS=(Non small cell lung carcinoma) OR TS=(Small cell lung cancer) OR TS=(Small cell lung carcinoma ) OR TS=(Adenocarcinoma of the lung) OR TS=(Lung adenocarcinoma) OR TS=(Squamous cell carcinoma of the lung ) OR TS=(Lung squamous cell carcinoma ) OR TS=(pulmonary squamous cell carcinoma ) OR TS=(pulmonary adenocarcinoma) OR TS=(Squamous cell lung cancer) OR TS=(Bronchial carcinoma ) OR TS=(Bronchial neoplasms) OR TS=(Carcinoma, bronchogenic) OR TS=(Bronchiolo alveolar adenocarcinoma ) OR TS=(Schneeberg disease)

Hits: 448,795.

Block 2:

TS=(pulmonary lavage) OR TS=(bronchoalveolar wash\*) OR TS=(bronchioalveolar wash\*) OR TS=(bronchopulmonary wash\*) OR TS=(pulmonary wash\*) OR TS=(bronchial wash\*) OR TS=(lung wash\*) OR TS=(lung washing) OR TS=(lung wash) OR TS=(bronchial washing ) OR TS=(Pulmonary washing) OR TS=(Pulmonary wash) OR TS=(Bronchopulmonary washing) OR TS=(Bronchopulmonary wash) OR TS=(Bronchioalveolar washing) OR TS=(Bronchioalveolar wash) OR TS=(Bronchoalveolar washing) OR TS=(Bronchoalveolar wash) OR TS=(Pulmonary lavage fluid) OR TS=(Bronchopulmonary lavage) OR TS=(lung lavage) OR TS=(bronchial fluid) OR TS=(Bronchial wash fluid) OR TS=(Bronchial wash ) OR TS=(Bronchioalveolar lavage fluid) OR TS=(Bronchioalveolar lavage) OR TS=(Bronchoalveolar lavage fluid) OR TS=(bronchoalveolar lavage) OR TS=(bronchial lavage fluid) OR TS=(bronchial lavage)

Hits: 51,807.

Block 3:

TS=(liquid biops\*) OR TS=(liquid biopsies) OR TS=(liquid biopsy) OR TS=(genetic methylat\*) OR TS=(genetic methylations) OR TS=(genetic methylation) OR TS=(methylat\*) OR TS=(methylated) OR TS=(methylations) OR TS=(methylation) OR TS=(methylated gene) OR TS=(gene methylat\*) OR TS=(gene methylations) OR TS=(gene methylation) OR TS=(dna methylat\*) OR TS=(dna methylations) OR TS=(dna methylation) OR TS=(methylated dna) OR TS=(cfdna) OR TS=(ctdna) OR TS=(circulating tumor-specific dna) OR TS=(circulating tumor specific dna) OR TS=(circulating cell free tumour dna) OR TS=(circulating cell-free tumor dna) OR TS=(circulating cell free tumor dna) OR TS=(circulating tumour dna) OR TS=(circulating tumor dna) OR TS=(cell-free tumour dna) OR TS=(cell free tumour dna) OR TS=(cell free tumor dna) OR TS=(cell-free tumor dna) OR TS=(cell-free dna) OR TS=(cell free dna) OR TS=(tumour dna) OR TS=(tumor dna)

Hits: 386,411.

Block 1 AND block 2 AND block 3

Hits: 349.

## 2. Detailed quality assessments of the included studies

Table S1: Patient selection

| Study ID              | 1. Patient selection. Was a consecutive or random sample of patients enrolled? | Was a case-control design avoided? | Did the study avoid inappropriate exclusions? | Could the selection of patients have introduced bias? | Is there concern that the included patients do not match the review question? |
|-----------------------|--------------------------------------------------------------------------------|------------------------------------|-----------------------------------------------|-------------------------------------------------------|-------------------------------------------------------------------------------|
| Kersting 2000 [22]    | Yes                                                                            | No                                 | Unclear                                       | Low risk                                              | Low risk                                                                      |
| Kim 2004 [23]         | Unclear                                                                        | No                                 | Yes                                           | Low risk                                              | Low risk                                                                      |
| Topaloglu 2004 [24]   | Unclear                                                                        | No                                 | Unclear                                       | Unclear risk                                          | Low risk                                                                      |
| de Fraipont 2005 [25] | Yes                                                                            | No                                 | Unclear                                       | Unclear risk                                          | Low risk                                                                      |

|                         |         |    |         |              |          |
|-------------------------|---------|----|---------|--------------|----------|
| Grote 2005 [26]         | Yes     | No | Yes     | Low risk     | Low risk |
| Schmiemann 2005 [27]    | Yes     | No | Yes     | Low risk     | Low risk |
| Schmidt 2010 [28]       | No      | No | Unclear | Unclear risk | Low risk |
| Schramm 2011 [9]        | Yes     | No | Yes     | Low risk     | Low risk |
| Dietrich 2012 [29]      | Unclear | No | Unclear | High risk    | Low risk |
| Nikolaidis 2012 [30]    | No      | No | Yes     | High risk    | Low risk |
| van der Drift 2012 [10] | Unclear | No | Unclear | Unclear risk | Low risk |
| Diaz-Lagares 2016 [31]  | No      | No | Unclear | High risk    | Low risk |
| Konecny 2016 [32]       | Unclear | No | Unclear | Unclear risk | Low risk |
| Ren 2017 [33]           | Unclear | No | Unclear | Unclear risk | Low risk |
| Zhang 2017 [34]         | Unclear | No | Yes     | High risk    | Low risk |
| Feng 2018 [35]          | Unclear | No | Unclear | Unclear risk | Low risk |
| Jeong 2018 [36]         | Unclear | No | Yes     | Low risk     | Low risk |
| Um 2018 [37]            | No      | No | Yes     | High risk    | Low risk |
| Dong 2019 [38]          | Unclear | No | Unclear | Unclear risk | Low risk |
| Villalba 2019 [39]      | No      | No | Unclear | Unclear risk | Low risk |
| Rizk 2020 [40]          | Unclear | No | Unclear | Unclear risk | Low risk |
| Roncarati 2020 [41]     | Yes     | No | Yes     | Low risk     | Low risk |
| Li 2021 [42]            | Unclear | No | Unclear | Unclear risk | Low risk |
| Wen 2021 [43]           | Yes     | No | Yes     | Low risk     | Low risk |
| Zeng 2021 [44]          | Yes     | No | Yes     | Low risk     | Low risk |

Table S2: Index test

| Study ID              | 2. Index test. Were the test results interpreted without knowledge of the results of the reference standard? | If a threshold was used, was it pre-specified? | Could the conduct or interpretation of the index test have introduced bias? | Is there concern that the index test, its conduct or interpretation differ from the review question? |
|-----------------------|--------------------------------------------------------------------------------------------------------------|------------------------------------------------|-----------------------------------------------------------------------------|------------------------------------------------------------------------------------------------------|
| Kersting 2000 [22]    | Unclear                                                                                                      | Unclear                                        | Unclear risk                                                                | Low risk                                                                                             |
| Kim 2004 [23]         | Unclear                                                                                                      | Unclear                                        | Unclear risk                                                                | Low risk                                                                                             |
| Topaloglu 2004 [24]   | Unclear                                                                                                      | No                                             | High risk                                                                   | Low risk                                                                                             |
| de Fraipont 2005 [25] | Unclear                                                                                                      | Unclear                                        | Unclear risk                                                                | Low risk                                                                                             |
| Grote 2005 [26]       | Yes                                                                                                          | No                                             | Low risk                                                                    | Low risk                                                                                             |

|                         |         |         |              |          |
|-------------------------|---------|---------|--------------|----------|
| Schmiemann 2005 [27]    | Yes     | Yes     | Low risk     | Low risk |
| Schmidt 2010 [28]       | Unclear | Unclear | Unclear risk | Low risk |
| Schramm 2011 [9]        | Yes     | Yes     | Low risk     | Low risk |
| Dietrich 2012 [29]      | Unclear | Yes     | High risk    | Low risk |
| Nikolaidis 2012 [30]    | Unclear | Yes     | Unclear risk | Low risk |
| van der Drift 2012 [10] | Unclear | Unclear | Unclear risk | Low risk |
| Diaz-Lagares 2016 [31]  | Unclear | Yes     | Unclear risk | Low risk |
| Konecny 2016 [32]       | Unclear | Unclear | Unclear risk | Low risk |
| Ren 2017 [33]           | Unclear | Unclear | Unclear risk | Low risk |
| Zhang 2017 [34]         | Unclear | Unclear | High risk    | Low risk |
| Feng 2018 [35]          | Unclear | Unclear | Unclear risk | Low risk |
| Jeong 2018 [36]         | Unclear | No      | Unclear risk | Low risk |
| Um 2018 [37]            | Unclear | Yes     | Low risk     | Low risk |
| Dong 2019 [38]          | Unclear | Yes     | Unclear risk | Low risk |
| Villalba 2019 [39]      | Unclear | No      | High risk    | Low risk |
| Rizk 2020 [40]          | Unclear | No      | Unclear risk | Low risk |
| Roncarati 2020 [41]     | Unclear | No      | Unclear risk | Low risk |
| Li 2021 [42]            | Unclear | Yes     | Unclear risk | Low risk |
| Wen 2021 [43]           | Yes     | Yes     | Low risk     | Low risk |
| Zeng 2021 [44]          | Unclear | Yes     | Low risk     | Low risk |

Table S3: Reference standard

| Study ID           | 3. Reference standard.<br>Is the reference standard likely to correctly classify the target condition? | Were the reference standard results interpreted without knowledge of the index test results? | Could the reference standard, its conduct, or its interpretation have introduced bias? | Is there concern that the target condition as defined by the reference standard does not match the review question? |
|--------------------|--------------------------------------------------------------------------------------------------------|----------------------------------------------------------------------------------------------|----------------------------------------------------------------------------------------|---------------------------------------------------------------------------------------------------------------------|
| Kersting 2000 [22] | Yes                                                                                                    | Yes                                                                                          | Low risk                                                                               | Low risk                                                                                                            |

|                         |         |         |              |          |
|-------------------------|---------|---------|--------------|----------|
| Kim 2004 [23]           | Yes     | Unclear | Low risk     | Low risk |
| Topaloglu 2004 [24]     | Yes     | Yes     | Low risk     | Low risk |
| de Fraipont 2005 [25]   | Yes     | Unclear | Unclear risk | Low risk |
| Grote 2005 [26]         | Yes     | Yes     | Low risk     | Low risk |
| Schmiemann 2005 [27]    | Yes     | Yes     | Low risk     | Low risk |
| Schmidt 2010 [28]       | Yes     | Yes     | Low risk     | Low risk |
| Schramm 2011 [9]        | Yes     | Yes     | Low risk     | Low risk |
| Dietrich 2012 [29]      | Yes     | Yes     | Low risk     | Low risk |
| Nikolaidis 2012 [30]    | Yes     | Unclear | Low risk     | Low risk |
| van der Drift 2012 [10] | Yes     | Unclear | Unclear risk | Low risk |
| Diaz-Lagares 2016 [31]  | Yes     | Unclear | Low risk     | Low risk |
| Konecny 2016 [32]       | Yes     | Unclear | Unclear risk | Low risk |
| Ren 2017 [33]           | Yes     | Unclear | Low risk     | Low risk |
| Zhang 2017 [34]         | Yes     | Unclear | Low risk     | Low risk |
| Feng 2018 [35]          | Yes     | Unclear | Unclear risk | Low risk |
| Jeong 2018 [36]         | Yes     | Unclear | Unclear risk | Low risk |
| Um 2018 [37]            | Yes     | Unclear | Low risk     | Low risk |
| Dong 2019 [38]          | Unclear | Unclear | Unclear risk | Low risk |
| Villalba 2019 [39]      | Yes     | Yes     | Low risk     | Low risk |
| Rizk 2020 [40]          | Yes     | Unclear | Unclear risk | Low risk |
| Roncarati 2020 [41]     | Yes     | Unclear | Low risk     | Low risk |
| Li 2021 [42]            | Yes     | Unclear | Low risk     | Low risk |
| Wen 2021 [43]           | Yes     | Yes     | Low risk     | Low risk |
| Zeng 2021 [44]          | Yes     | Yes     | Low risk     | Low risk |

Table S4: Flow and timing

| Study ID | 4. Flow and timing.<br>Was there an appropriate interval between index test | Did all patients receive a reference standard? | Did patients receive the same reference standard? | Were all patients included in the analysis? | Could the patient flow have introduced bias? |
|----------|-----------------------------------------------------------------------------|------------------------------------------------|---------------------------------------------------|---------------------------------------------|----------------------------------------------|
|----------|-----------------------------------------------------------------------------|------------------------------------------------|---------------------------------------------------|---------------------------------------------|----------------------------------------------|



|                            | and reference<br>standard? |         |         |     |          |
|----------------------------|----------------------------|---------|---------|-----|----------|
| Kersting 2000<br>[22]      | Unclear                    | Yes     | Yes     | Yes | Low risk |
| Kim 2004 [23]              | Yes                        | Yes     | Yes     | Yes | Low risk |
| Topaloglu 2004<br>[24]     | Yes                        | Yes     | Yes     | Yes | Low risk |
| de Fraipont 2005<br>[25]   | Yes                        | Yes     | No      | Yes | Low risk |
| Grote 2005 [26]            | Yes                        | Yes     | No      | No  | Low risk |
| Schmiemann<br>2005 [27]    | Yes                        | Yes     | No      | Yes | Low risk |
| Schmidt 2010 [28]          | Yes                        | Yes     | No      | Yes | Low risk |
| Schramm 2011<br>[9]        | Yes                        | Yes     | No      | Yes | Low risk |
| Dietrich 2012 [29]         | Yes                        | Yes     | No      | No  | Low risk |
| Nikolaidis 2012<br>[30]    | Yes                        | Yes     | Unclear | Yes | Low risk |
| van der Drift<br>2012 [10] | Yes                        | Yes     | No      | Yes | Low risk |
| Diaz-Lagares<br>2016 [31]  | Yes                        | Yes     | Unclear | Yes | Low risk |
| Konecny 2016<br>[32]       | Yes                        | Yes     | No      | Yes | Low risk |
| Ren 2017 [33]              | Yes                        | Yes     | Yes     | Yes | Low risk |
| Zhang 2017 [34]            | Yes                        | Yes     | Yes     | Yes | Low risk |
| Feng 2018 [35]             | Yes                        | Yes     | Yes     | Yes | Low risk |
| Jeong 2018 [36]            | Yes                        | Yes     | No      | No  | Low risk |
| Um 2018 [37]               | Yes                        | Yes     | Yes     | Yes | Low risk |
| Dong 2019 [38]             | Unclear                    | Unclear | Unclear | Yes | Unclear  |
| Villalba 2019 [39]         | Yes                        | Yes     | Yes     | No  | Low risk |
| Rizk 2020 [40]             | Unclear                    | Yes     | No      | Yes | Low risk |
| Roncarati 2020<br>[41]     | Yes                        | Yes     | Yes     | No  | Low risk |
| Li 2021 [42]               | Yes                        | Yes     | Yes     | No  | Low risk |
| Wen 2021 [43]              | Yes                        | Yes     | No      | Yes | Low risk |
| Zeng 2021 [44]             | Yes                        | Yes     | Yes     | Yes | Low risk |

Table S5: Conflicts of interest

| Study ID                | Did the authors report any conflicts of interest? | Did the authors report any conflicts of interest? supporting text                                                                                                                                                                                                                                                                                                             |
|-------------------------|---------------------------------------------------|-------------------------------------------------------------------------------------------------------------------------------------------------------------------------------------------------------------------------------------------------------------------------------------------------------------------------------------------------------------------------------|
| Kersting 2000 [22]      | Unclear                                           |                                                                                                                                                                                                                                                                                                                                                                               |
| Kim 2004 [23]           | No                                                |                                                                                                                                                                                                                                                                                                                                                                               |
| Topaloglu 2004 [24]     | Yes                                               | Oncogenome Sciences.                                                                                                                                                                                                                                                                                                                                                          |
| de Fraipont 2005 [25]   | Unclear                                           |                                                                                                                                                                                                                                                                                                                                                                               |
| Grote 2005 [26]         | Unclear                                           |                                                                                                                                                                                                                                                                                                                                                                               |
| Schmiemann 2005 [27]    | Unclear                                           |                                                                                                                                                                                                                                                                                                                                                                               |
| Schmidt 2010 [28]       | Yes                                               | Volker Liebenberg, Dimo Dietrich, Thomas Schlegel, Christoph Kneip, Anke Seegebarth, Nadja Flemming, Stefanie Seemann, Jörn Lewin, Juergen Distler, Ulrike Wille, and Reimo Tetzner are or have been employees and/or stockholders of Epigenomics AG, a company that aims to commercialize DNA methylation markers. John Field is a member of the Epigenomics Advisory Board. |
| Schramm 2011 [9]        | Yes                                               | Motic Company, China                                                                                                                                                                                                                                                                                                                                                          |
| Dietrich 2012 [29]      | No                                                | But they performed the study in order to get a CE marking for the Epi proLung BL Reflex Assay.                                                                                                                                                                                                                                                                                |
| Nikolaidis 2012 [30]    | Yes                                               | J.R. Gosney has honoraria from Speakers Bureau and is a consultant/advisoryboard member of Eli Lilly, AstraZeneca, and Pfizer. No potential conflicts of interest were disclosed by the other authors.                                                                                                                                                                        |
| van der Drift 2012 [10] | No                                                |                                                                                                                                                                                                                                                                                                                                                                               |
| Diaz-Lagares 2016 [31]  | Yes                                               | J. Zulueta has ownership interest (including patents) in VisionGate, Inc. No potential conflicts of interest were disclosed by the other authors                                                                                                                                                                                                                              |
| Konecny 2016 [32]       | Unclear                                           |                                                                                                                                                                                                                                                                                                                                                                               |
| Ren 2017 [33]           | No                                                |                                                                                                                                                                                                                                                                                                                                                                               |
| Zhang 2017 [34]         | No                                                |                                                                                                                                                                                                                                                                                                                                                                               |
| Feng 2018 [35]          | No                                                |                                                                                                                                                                                                                                                                                                                                                                               |
| Jeong 2018 [36]         | No                                                |                                                                                                                                                                                                                                                                                                                                                                               |
| Um 2018 [37]            | No                                                |                                                                                                                                                                                                                                                                                                                                                                               |
| Dong 2019 [38]          | Yes                                               | W. Yu and Shihua Dong report having a pending patent application.                                                                                                                                                                                                                                                                                                             |
| Villalba 2019 [39]      | No                                                |                                                                                                                                                                                                                                                                                                                                                                               |
| Rizk 2020 [40]          | No                                                |                                                                                                                                                                                                                                                                                                                                                                               |

|                     |     |                                                                                                                                                                                                                                                 |
|---------------------|-----|-------------------------------------------------------------------------------------------------------------------------------------------------------------------------------------------------------------------------------------------------|
| Roncarati 2020 [41] | No  |                                                                                                                                                                                                                                                 |
| Li 2021 [42]        | Yes | Zhujia Ye, Hao Yang, Jinsheng Tao, Siyu Chen, Jiehan Xu, Yanying Liu, Weihe Liang, Bo Wang, Zhiwei Chen, Jian-Bing Fan are employees of AnchorDx Medi-cal Co, Ltd. or AnchorDx, Inc. All other authors declare no competing financial interest. |
| Wen 2021 [43]       | Yes | NK Max outside of the submitted work.                                                                                                                                                                                                           |
| Zeng 2021 [44]      | Yes | Many authors were employed by Burning Rock Biotech.                                                                                                                                                                                             |

### 3. Diagnostic properties of all genes in the included studies

Table S6: Sensitivity and specificity of included studies

| Study ID              | Gene name                                                                                                   | Sens  | Spec  | AUC |
|-----------------------|-------------------------------------------------------------------------------------------------------------|-------|-------|-----|
| 2000 Kersting [22]    | p16INK4a                                                                                                    | 22%   | 88%   |     |
| 2004 Kim [23]         | p16                                                                                                         | 16.5% | 93.7% |     |
|                       | RASSF1A                                                                                                     | 17.6% | 96.1% |     |
|                       | FHIT                                                                                                        | 22.4% | 71.7% |     |
|                       | H-cadherin                                                                                                  | 12.9% | 96.9% |     |
|                       | RAR-b                                                                                                       | 15.3% | 87.4% |     |
| 2004 Topaloglu [24]   | CDH1                                                                                                        | 48 %  | 100 % |     |
|                       | APC                                                                                                         | 29 %  | 100 % |     |
|                       | MGMT                                                                                                        | 58 %  | 100 % |     |
|                       | RASSF1A                                                                                                     | 29 %  | 100 % |     |
|                       | GSTP1                                                                                                       | 33 %  | 100 % |     |
|                       | p16                                                                                                         | 14%   |       |     |
|                       | RAR-b2                                                                                                      | 0%    |       |     |
|                       | ARF                                                                                                         |       |       |     |
| 2005 de Fraipont [25] | p16                                                                                                         | 15.2% | 81.4% |     |
|                       | DAPK                                                                                                        | 5.9%  | 95.3% |     |
|                       | MGMT                                                                                                        | 20.6% | 79.1% |     |
|                       | FHIT                                                                                                        | 29.4% | 66.7% |     |
|                       | APC                                                                                                         | 0 %   | 93.1% |     |
|                       | p16, cancer                                                                                                 | 11.8% |       |     |
|                       | DAPK, cancer                                                                                                | 16.7% |       |     |
|                       | MGMT, cancer                                                                                                | 5.6%  |       |     |
|                       | FHIT, cancer                                                                                                | 37.5% |       |     |
|                       | APC, cancer                                                                                                 | 0 %   |       |     |
|                       | At least one gene: sens 55.9%, spec 44.2% for all.<br>Excluding preinvasive lesions sens 55.6%, spec 44.2%. |       |       |     |

|                            |                                                            |                                        |                                                |      |
|----------------------------|------------------------------------------------------------|----------------------------------------|------------------------------------------------|------|
|                            |                                                            |                                        |                                                |      |
| 2005 Grote [26]            | p16INK4a                                                   | 24 %                                   | 100 %                                          |      |
|                            | RARB2                                                      | 56% calculated<br>(they report<br>80%) | 87.5%<br>calculated<br>(they<br>report<br>52%) |      |
|                            | SEMA3B                                                     | 88 %                                   | 8 %                                            |      |
| 2005 Schmiemann<br>[27]    | APC                                                        | 16.5%                                  | 99 %                                           |      |
|                            | p16INK4a                                                   | 11.8%                                  | 100 %                                          |      |
|                            | RAR-b2                                                     | 47.1%                                  | 79.4%                                          |      |
|                            | RASSF1A                                                    | 41.2%                                  | 100 %                                          |      |
|                            | APC, p16, RASSF1A                                          | 53 %                                   | 99 %                                           |      |
|                            | APC, p16, RASSF1A, RARB2                                   | 71 %                                   | 78 %                                           |      |
| 2010 Schmidt [28]          | SHOX2                                                      | 68 %                                   | 95 %                                           | 86 % |
| 2011 Schramm [9]           | APC, p16INK4A, RASSF1A, whole cohort.                      | 49.6%                                  | 98.4%                                          |      |
|                            | APC, p16INK4A, RASSF1A, Equivocal cases                    | 49.0%                                  | 95 %                                           |      |
|                            | RASSF1A                                                    |                                        |                                                |      |
| 2012 Dietrich [29]         | SHOX2                                                      | 78 %                                   | 96 %                                           | 94 % |
| 2012 Nikolaidis<br>[30]    | p16, TERT, WT1, and RASSF1                                 |                                        |                                                |      |
|                            | TERT test / validation                                     | 67.0% / 54.0%                          | 83.6% /<br>98.2%                               |      |
|                            | RASSF1 test / validation                                   | 38.7% / 51.1%                          | 96.7% /<br>100%                                |      |
|                            | WT1 test / validation                                      | 36.1% / 52.5%                          | 95.3% /<br>93.5%                               |      |
|                            | p16 test / validation                                      | 18.6% / 12.9%                          | 99.5% /<br>100%                                |      |
|                            | CYGB test / validation                                     | 18.6% / 10.8%                          | 92.5% /<br>100%                                |      |
|                            | RARBeta test / validation                                  | 14.4% / 48.2%                          | 95.3% /<br>83.5%                               |      |
|                            | Combined 6 test / validation                               | 79.4% / 82.0%                          | 79.8% /<br>90.8%                               |      |
|                            | 4 genes and demographic data validation                    | 82 %                                   | 91 %                                           |      |
| 2012 van der Drift<br>[10] | RASSF1A                                                    | 42.6%                                  | 96.4%                                          |      |
| 2016 Diaz-Lagares<br>[31]  | Combined model, aspirates (BCAT1, CDO1,<br>TRIM58, ZNF177) | 84.6%                                  | 81 %                                           | 90 % |

|                     |                                                                             |       |       |                                       |
|---------------------|-----------------------------------------------------------------------------|-------|-------|---------------------------------------|
|                     |                                                                             |       |       | 0.91 [95% CI (0.83–0.98) $p < 0.001$  |
|                     | BCAT1, BAL                                                                  |       |       | 80 %                                  |
|                     | CDO1, BAL                                                                   |       |       | 65 %                                  |
|                     | TRIM58, BAL                                                                 |       |       | 72 %                                  |
|                     | ZNF177, BAL                                                                 |       |       | 66 %                                  |
|                     | Combined model, BAL                                                         |       |       | 83 % 95% CI (0.78–0.93) $p < 0.001$   |
| 2016 Konecny [32]   | SHOX2                                                                       | 83.8% | 84.6% |                                       |
| 2017 Ren [33]       | SHOX2                                                                       | 64.2% | 92.9% |                                       |
|                     | RASSF1A                                                                     | 50.4% | 95.5% |                                       |
|                     | Any of the two                                                              | 71.5% | 90.2% |                                       |
| 2017 Zhang [34]     | SHOX2                                                                       |       |       |                                       |
|                     | SHOX2, RASSF1A (combined model)                                             | 81.0% | 97.4% |                                       |
| 2018 Feng [35]      | NID2                                                                        | 30.4% | 83 %  | 63.2%                                 |
| 2018 Jeong [36]     | PCDHGA12                                                                    | 75 %  | 78.9% | 81.9%                                 |
| 2018 Um [37]        | TFAP2A, TBX15, PRR15, HOXA11, PDGFRA, TOX2, PHF11 combined in a logit model | 87.0% | 83.3% | 87 %                                  |
| 2019 Dong [38]      | Combined marker, training                                                   | 78.6% | 96.7% | 0.91; 95% CI, 0.86–0.96; $p < 0.0001$ |
|                     | Combined marker, validation                                                 | 82.5% | 96.5% |                                       |
| 2019 Villalba [39]  | TMPRSS4                                                                     |       |       | 59% (95% CI 47–71%)                   |
|                     | SHOX2                                                                       |       |       | 71% (95% CI 60–81%)                   |
|                     | TMPRSS4 early stage                                                         | 52 %  | 91 %  |                                       |
|                     | SHOX2 early stage                                                           | 86 %  | 60 %  |                                       |
|                     | Combined                                                                    |       |       | 76% (95% CI 62–86%)                   |
| 2020 Rizk [40]      | SHOX2                                                                       | 77 %  | 70 %  | 91 %                                  |
| 2020 Roncarati [41] | RASSF1A                                                                     | 46 %  | 100 % |                                       |
|                     | CDH1                                                                        | 64 %  | 74 %  |                                       |
|                     | DLC1                                                                        | 37 %  | 94 %  |                                       |
|                     | PRPH                                                                        | 40 %  | 100 % |                                       |
|                     | Any methylation positive                                                    | 97 %  | 74 %  | 93 %                                  |

|                |                          |       |       |    |
|----------------|--------------------------|-------|-------|----|
|                |                          |       |       |    |
| 2021 Li [42]   | PTGER4-1                 | 73    | 60    |    |
|                | PTGER4-2                 | 75    | 73    |    |
|                | HOXB4-1                  | 74    | 71    |    |
|                | HOXB4-2                  | 67    | 64    |    |
|                | HOXB4-3                  | 71    | 73    |    |
|                | HOXB4-4                  | 48    | 81    |    |
|                | IHX9                     | 59    | 77    |    |
|                | GSHR                     | 62    | 62    |    |
|                | MIR196A1                 | 58    | 78    |    |
|                | HOXA11                   | 55    | 79    |    |
|                | CDO1                     | 55    | 84    | 72 |
|                | 5 gene model, test       | 82    | 91    |    |
|                | 5 gene model, validation | 70    | 82    |    |
| 2021 Wen [43]  | HOXA9, test              | 73.1% | 85.3% |    |
|                | HOXA9, validation        | 80.0% | 75.6% |    |
| 2021 Zeng [44] | Methylation model        | 81 %  | 81 %  |    |

Figure S1: Forest plot of sensitivity and specificity for the SHOX2 gene

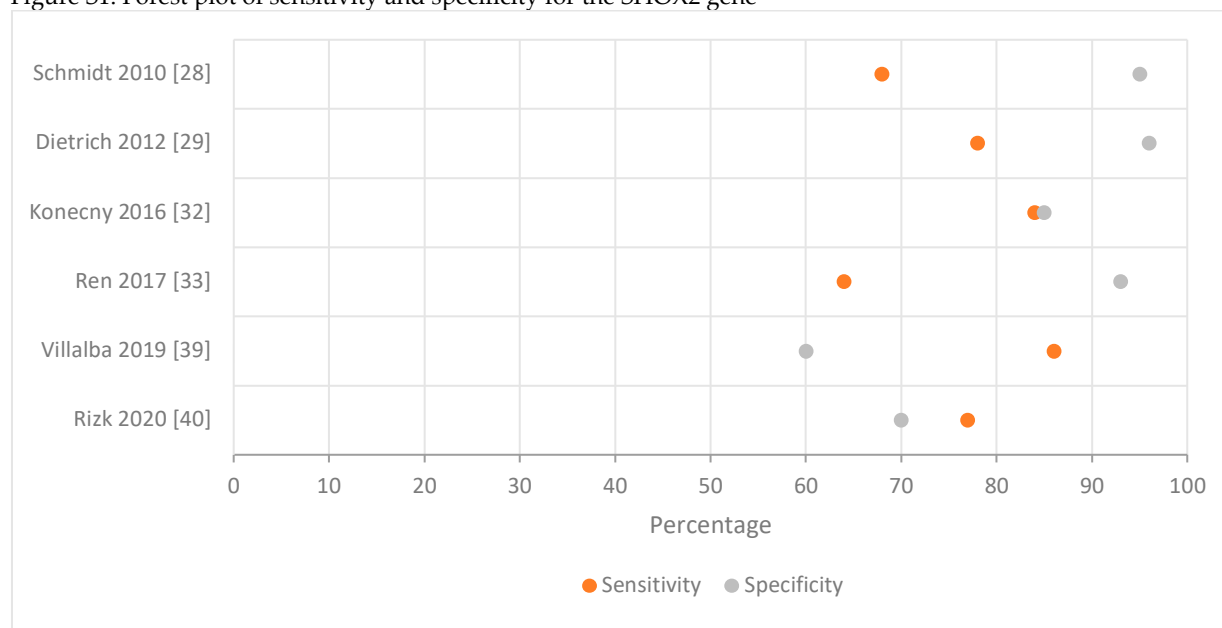

**Figure S1.** Forest plot illustrating the sensitivity (orange) and specificity (gray) of the SHOX2 gene. The x-axis represents study sensitivity and specificity in percent. There are no whiskers, since many studies did not report a 95% confidence interval.

Figure S2: Forest plot of sensitivity and specificity for the RARbeta2 gene

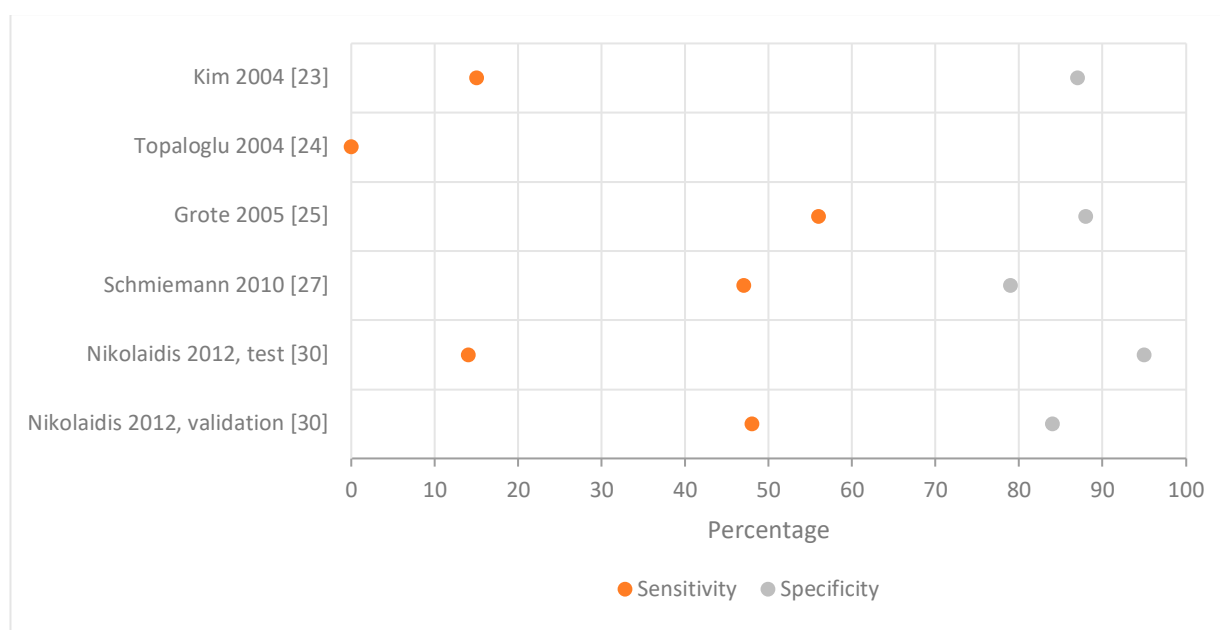

**Figure S2.** Forest plot illustrating the sensitivity (orange) and specificity (gray) of the RARbeta2 gene. If a test and validation approach was used, both cohorts were included in the graph. The x-axis represents study sensitivity and specificity in percent. There are no whiskers, since many studies did not report a 95% confidence interval.
